# Supplementary material for: Biodegradation Potential of Polyethylene Terephthalate by the Two Insect Gut Symbionts Xanthomonas sp. HY-74 and Bacillus sp. HY-75
Source: MDPI journal article supplement (doi:10.3390/polym15173546), 2023-08-25
Supplement: s1 [file s1]

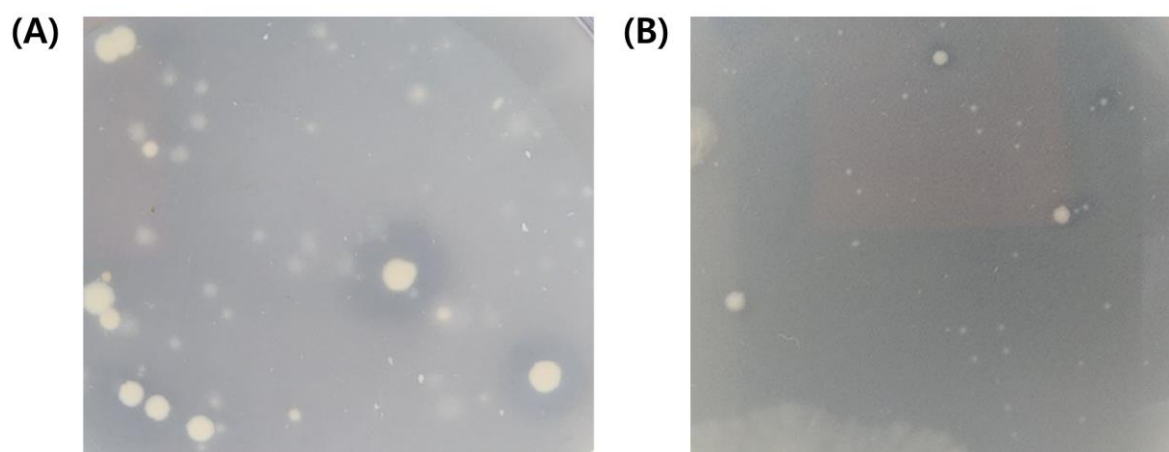

**Figure S1.** Screening of PET degrading bacteria, *Xanthomonas* sp. HY-74 strain from *Xylocopa appendiculata* (A) and *Bacillus* sp. HY-75 from *Eumenes decorates* (B).
